# Supplementary material for: Epidemiological Prevalence of Phenotypical Resistances and Mobilised Colistin Resistance in Avian Commensal and Pathogenic E. coli from Denmark, France, The Netherlands, and the UK
Source: MDPI journal article supplement (doi:10.3390/antibiotics11050631), 2022-05-07
Supplement: s1 [file s1]

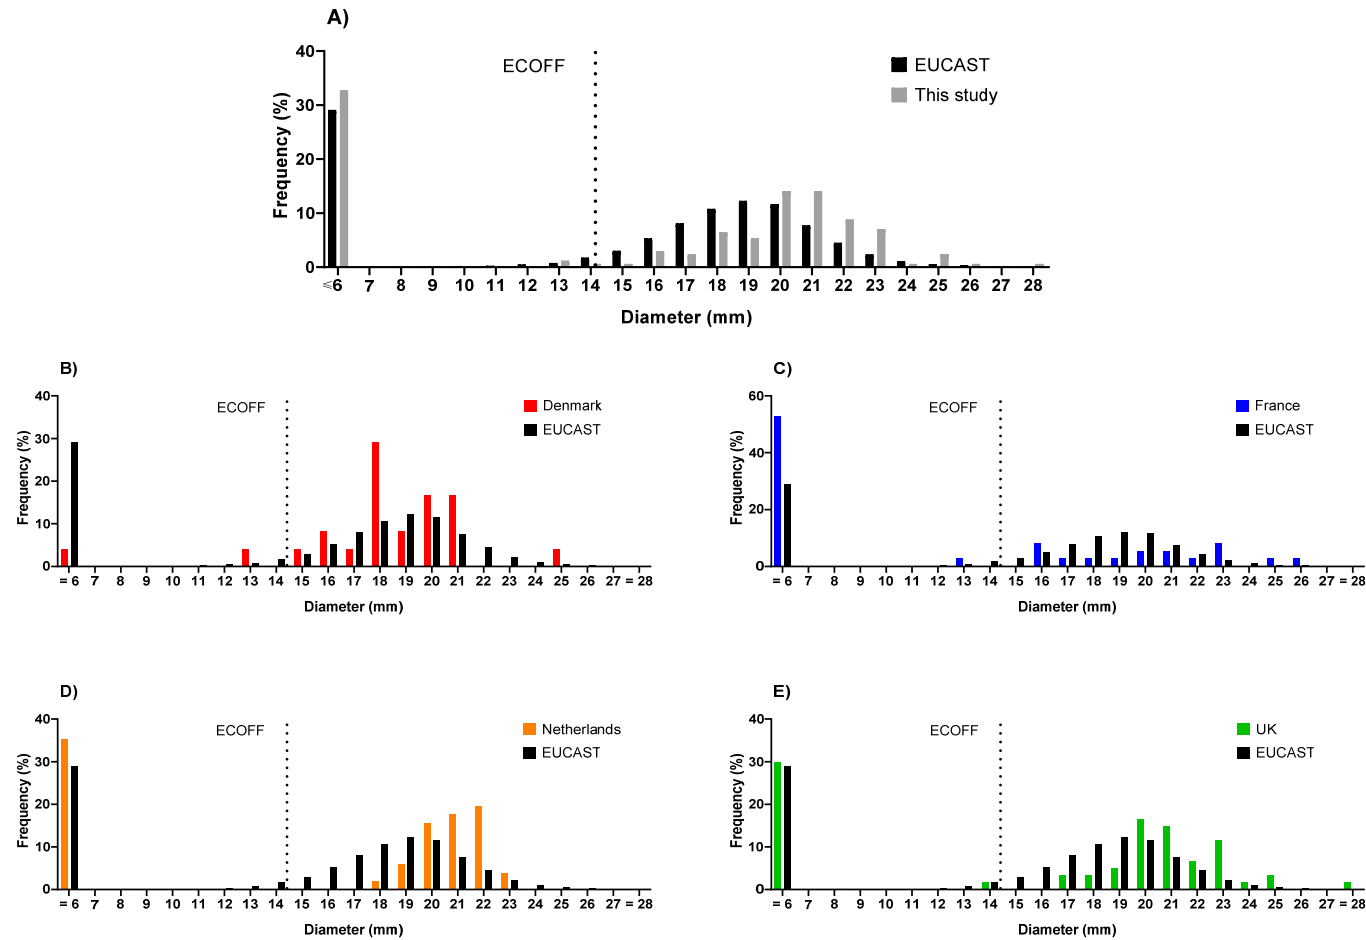

**Supplementary Figure S1.** *E. coli* ampicillin (10 µg) disk-diffusion diameter distribution comparison between EUCAST and (A) all tested isolates, (B) Denmark (n = 25), (C) France\* (n = 39), (D) Netherlands (n = 51), and (E) UK (n = 60). \* p = 0.05.

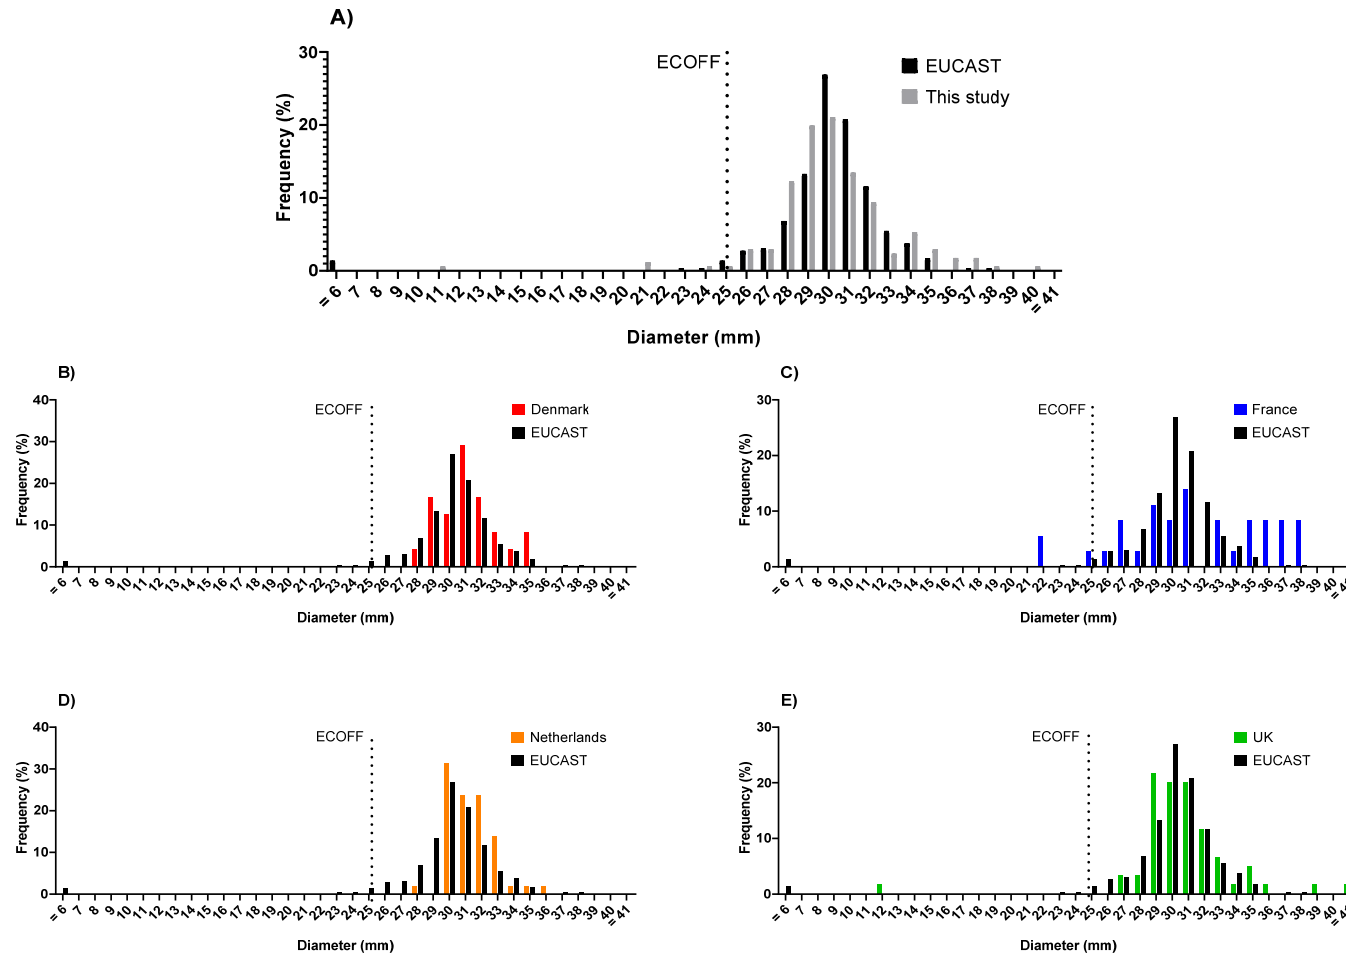

**Supplementary Figure S2.** *E. coli* Ceftriaxone (30 µg) disk-diffusion diameter distribution comparison between EUCAST and (A) all tested isolates, (B) Denmark\*\*\* (n = 25), (C) France\*\*\* (n = 39), (D) Netherlands\*\*\* (n = 51), and (E) UK\*\*\* (n = 60). \* p = 0.05, \*\* p = 0.01, \*\*\* p ≤ 0.001.

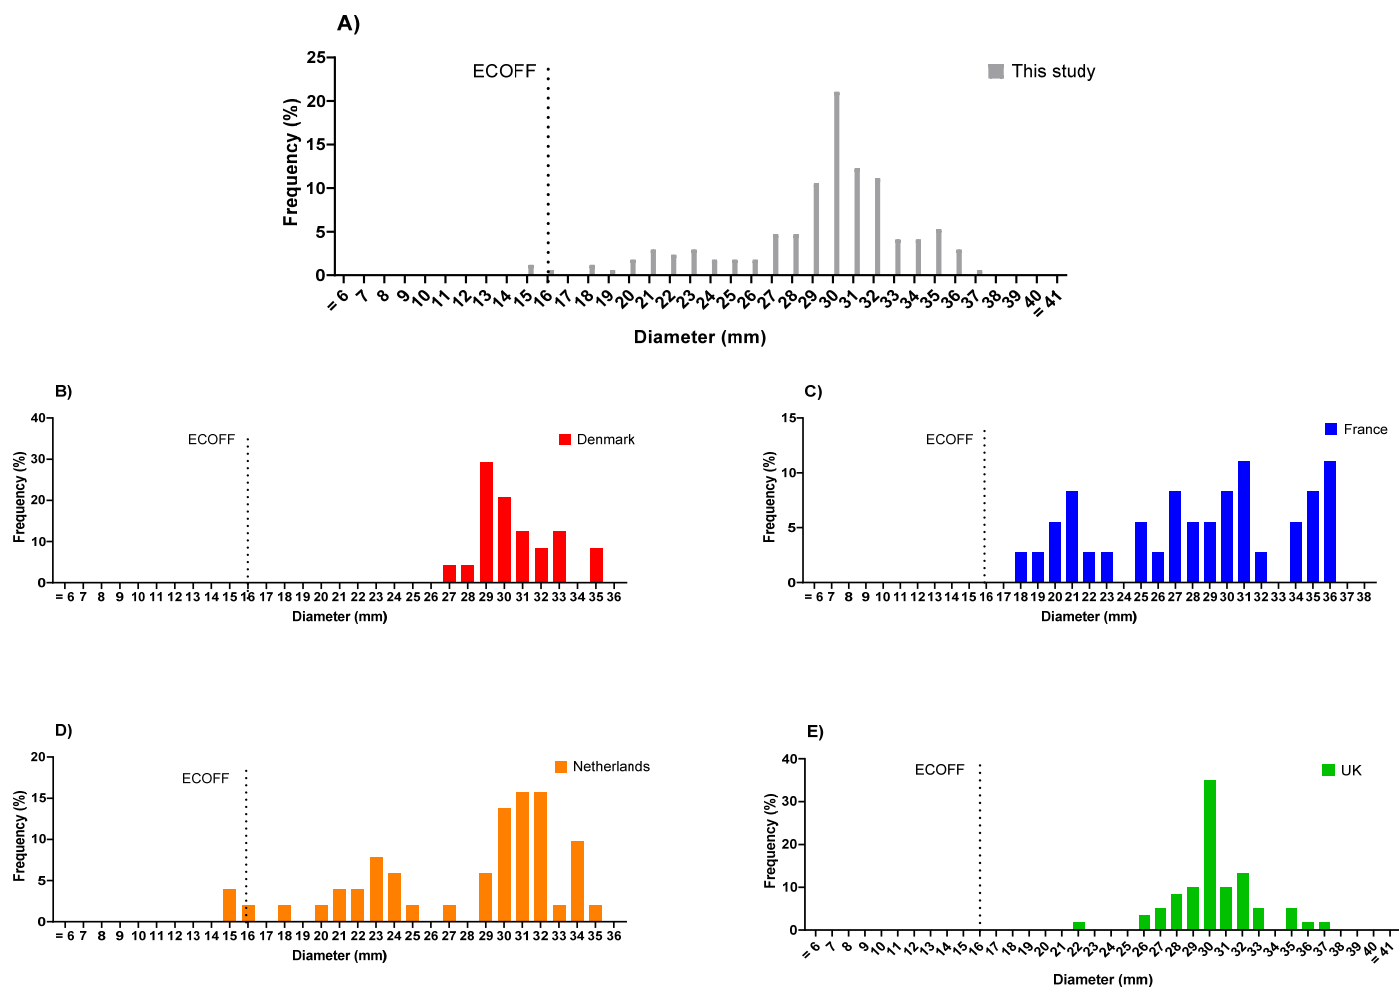

**Supplementary Figure S3.** *E. coli* Enrofloxacin (5 µg) disk-diffusion diameter distributions for (A) all tested isolates, (B) Denmark (n = 25), (C) France (n = 39), (D) Netherlands (n = 51), and (E) UK (n = 60).

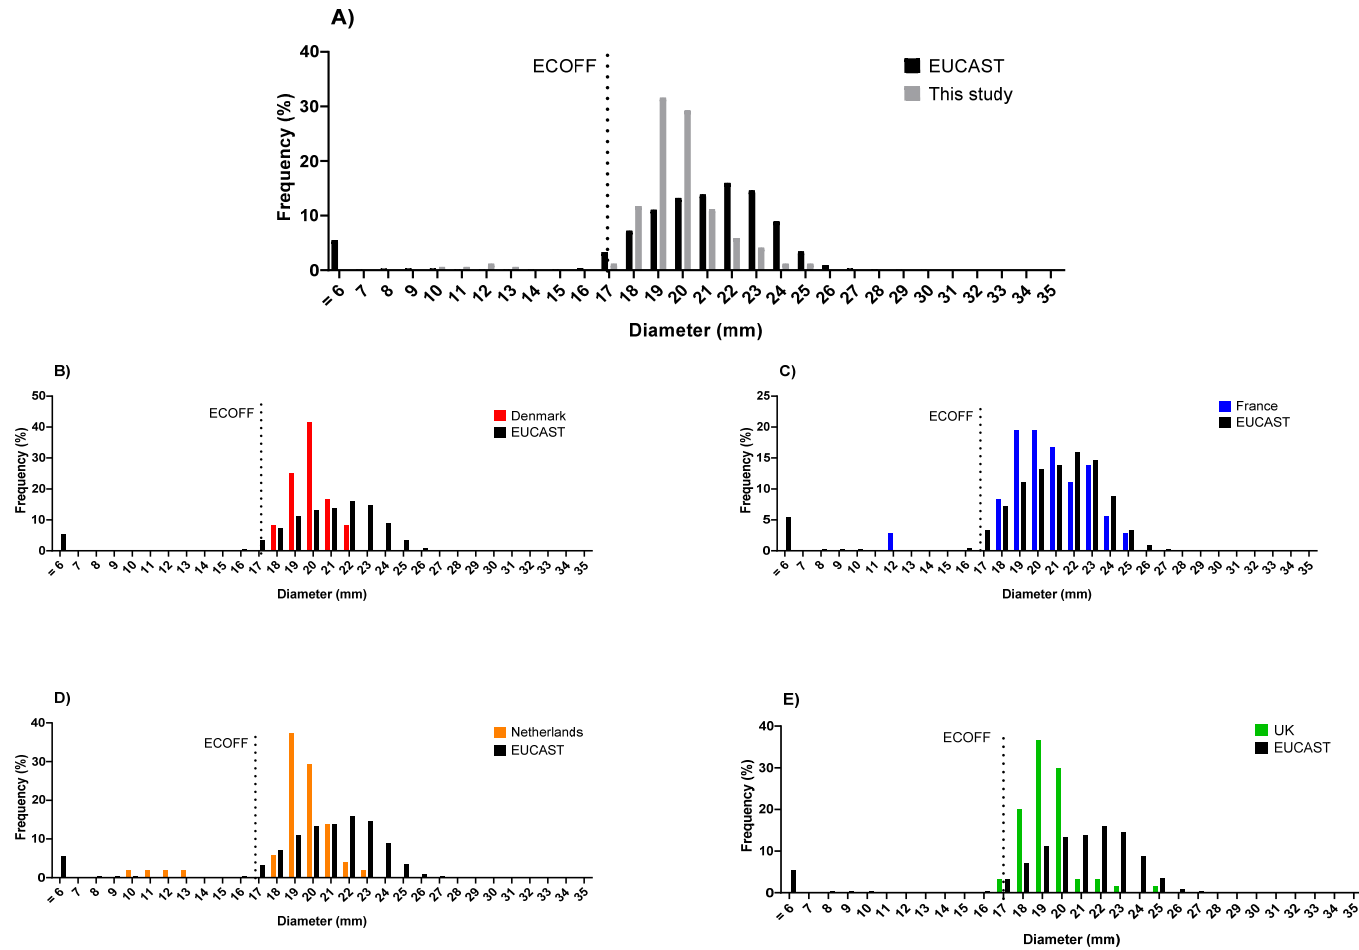

**Supplementary Figure S4.** *E. coli* Gentamicin (10 µg) disk-diffusion diameter distribution comparison between EUCAST and (A) all tested isolates, (B) Denmark<sup>\*\*\*</sup> (n = 25), (C) France<sup>\*\*\*</sup> (n = 39), (D) Netherlands<sup>\*\*\*</sup> (n = 51), and (E) UK<sup>\*</sup> (n = 60). \* p = 0.05, \*\* p = 0.01, \*\*\* p ≤ 0.001.

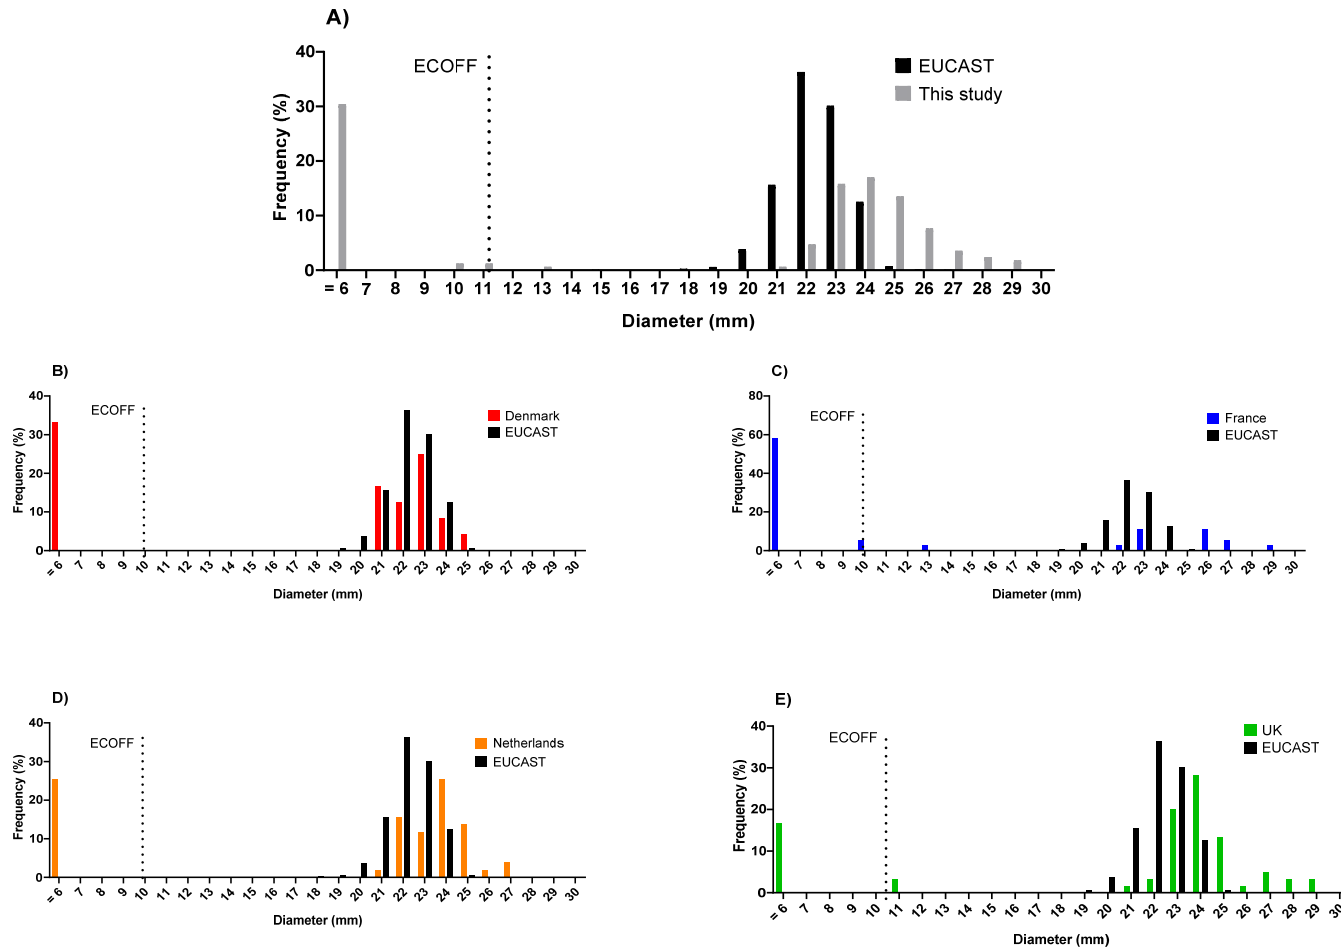

**Supplementary Figure S5.** *E. coli* Tetracycline (30 µg) disk-diffusion diameter distribution comparison between EUCAST and (A) all tested isolates, (B) Denmark<sup>\*\*\*</sup> (n = 25), (C) France<sup>\*\*\*</sup> (n = 39), (D) Netherlands<sup>\*\*\*</sup> (n = 51), and (E) UK<sup>\*\*\*</sup> (n = 60). \* p = 0.05, \*\* p = 0.01, \*\*\* p ≤ 0.001.

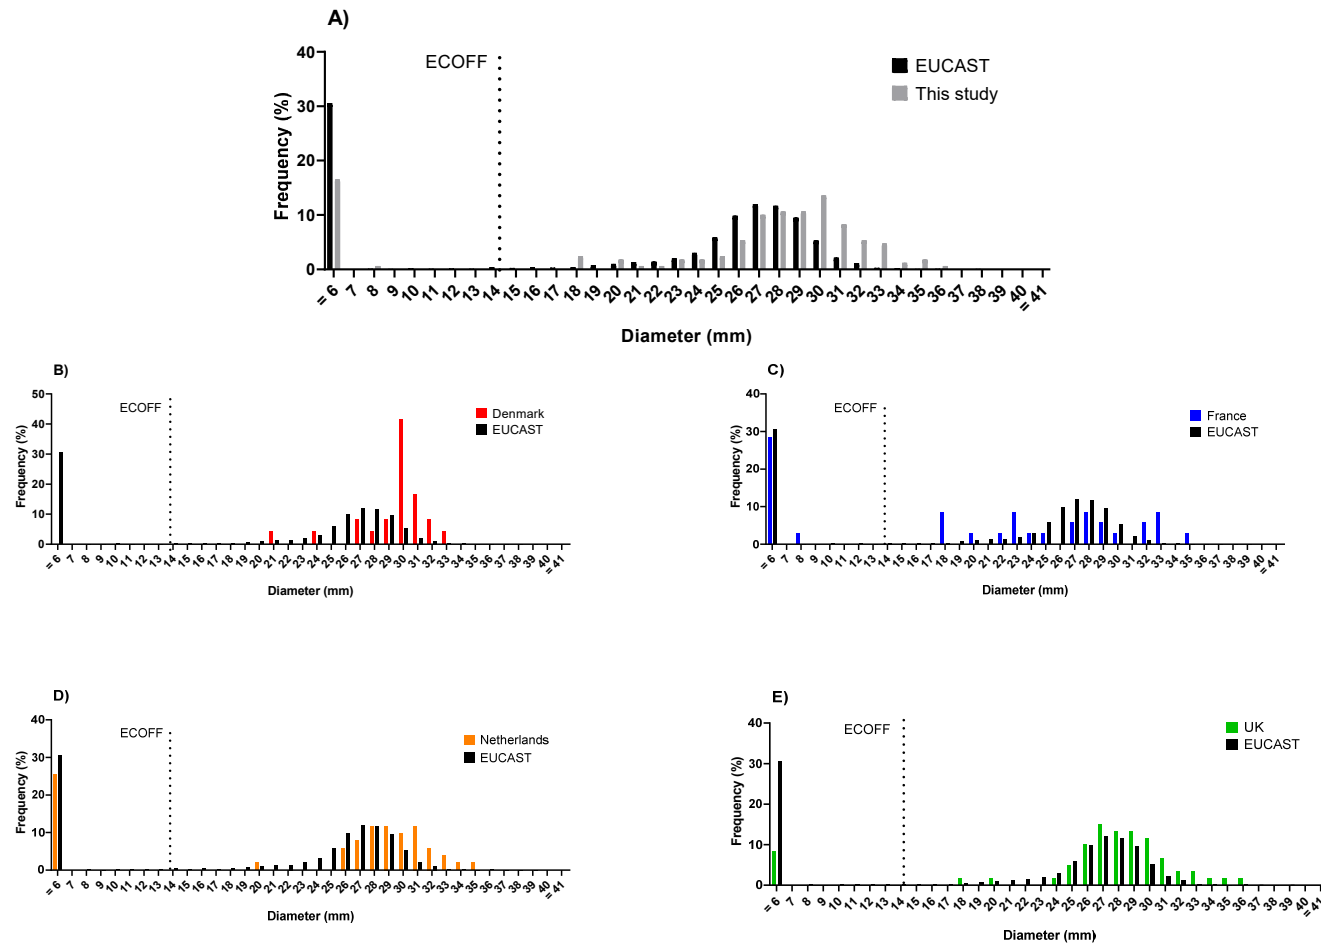

**Supplementary Figure S6.** *E. coli* Trimethoprim/Sulfamethoxazole (1:19; 25 µg) disk-diffusion diameter distribution comparison between EUCAST and (A) all tested isolates, (B) Denmark\*\*\* (n = 25), (C) France (n = 39), (D) Netherlands\* (n = 51), and (E) UK\*\*\* (n = 60). \* p = 0.05, \*\* p = 0.01, \*\*\* p ≤ 0.001.
